# Supplementary material for: Antidepressant Effect of Intermittent Long-Term Systemic Administration of Irisin in Mice
Source: MDPI journal article supplement (doi:10.3390/ijms23147596), 2022-07-08
Supplement: s1 [file s1]

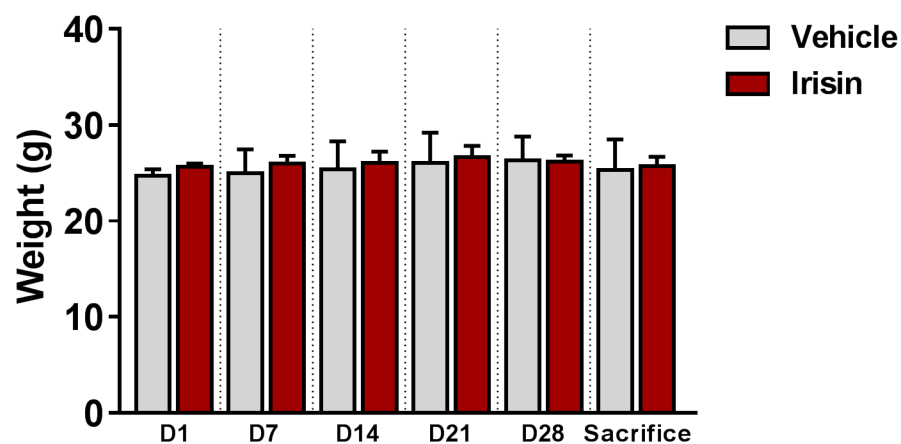

**Figure S1.** Irisin effect on body weight at day 1 (D1), day 7 (D7), day 14 (D14), day 21 (D21), day 28 (D28) and before mouse sacrifice. Histograms represent mean values  $\pm$  SEM. One-way ANOVA was used for statistical analysis.
